# Supplementary material for: Geoscientists' views about science communication: predicting willingness to communicate geoscience
Source: Copernicus journal article supplement (doi:10.5194/gc-6-15-2023), 2023-03-02
Supplement: Supplementary file 1 [file gc-6-15-2023-supplement.pdf]

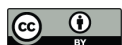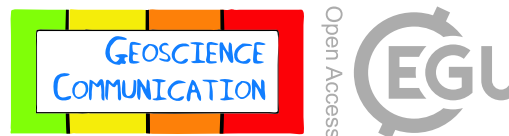

*Supplement of*

## **Geoscientists' views about science communication: predicting willingness to communicate geoscience**

**Joana Rodrigues et al.**

*Correspondence to:* Joana Rodrigues (joana225@gmail.com)

The copyright of individual parts of the supplement might differ from the article licence.

## Supplementary Material A

Survey on geoscience communication practices and perceptions <sup>(\*)</sup>, <sup>(\*\*)</sup>

| Indicator                      |                                | Question                                                                                                                                                                                                                                                                                                                                                                                                                                                                                                                     |
|--------------------------------|--------------------------------|------------------------------------------------------------------------------------------------------------------------------------------------------------------------------------------------------------------------------------------------------------------------------------------------------------------------------------------------------------------------------------------------------------------------------------------------------------------------------------------------------------------------------|
| <b>Biographical profile</b>    |                                |                                                                                                                                                                                                                                                                                                                                                                                                                                                                                                                              |
| <b>Biographical profile</b>    | Age                            | Q1. Age: < 30, 30-40, 41-50, > 50 years old                                                                                                                                                                                                                                                                                                                                                                                                                                                                                  |
|                                | Gender                         | Q2. Gender: Female, Male, Other                                                                                                                                                                                                                                                                                                                                                                                                                                                                                              |
|                                | Academic context               | Q3. Academic degree                                                                                                                                                                                                                                                                                                                                                                                                                                                                                                          |
|                                |                                | Q4. Degree area                                                                                                                                                                                                                                                                                                                                                                                                                                                                                                              |
|                                | Area of expertise              | Q10. Did you receive any training in communication? Yes, no                                                                                                                                                                                                                                                                                                                                                                                                                                                                  |
|                                |                                | Q5. Area of expertise                                                                                                                                                                                                                                                                                                                                                                                                                                                                                                        |
|                                | Professional category          | Q6. How do you describe your scientific area? Pure; applied                                                                                                                                                                                                                                                                                                                                                                                                                                                                  |
|                                | Professional experience        | Q7. Professional Category: post graduation student; technician; researcher; higher education professor; elementary and secondary education teacher; science communicator, other                                                                                                                                                                                                                                                                                                                                              |
| <b>Experiences / Practices</b> | Geographical context           | Q9. Professional experience: < 5, 5-10, 10-20, > 20 years                                                                                                                                                                                                                                                                                                                                                                                                                                                                    |
|                                |                                | Q8. Location of the institution where you work                                                                                                                                                                                                                                                                                                                                                                                                                                                                               |
|                                | <b>Experiences / Practices</b> |                                                                                                                                                                                                                                                                                                                                                                                                                                                                                                                              |
|                                | Frequency                      | Q12. How many science communication activities have you carried out in the last year? More than 10; 4-9; 1-3, none                                                                                                                                                                                                                                                                                                                                                                                                           |
|                                | Type of activities             | What kind of science communication activities do you usually promote?<br>(Never; rarely; usually; often)<br>Q11.1 Field trips<br>Q11.2 Visits to Museums<br>Q11.3 Visits to Science Centres<br>Q11.4 Visits to research institutions<br>Q11.5 Workshops<br>Q11.6 Exhibitions<br>Q11.7 Public lectures<br>Q11.8 Public Debates / Clarification Sessions<br>Q11.9 Science Exhibitions (exhibitions, fairs, ...)<br>Q11.10 Books<br>Q11.11 Scientific papers<br>Q11.12 Popular science news articles<br>Q11.13 Opinion articles |
|                                |                                | Q20. What kind of science communication initiatives in general have you participated in [Portuguese initiatives]?<br>Select: Science Cafes (Ciência Viva); '90 seconds science' (radio show); Tertúlias FNACiência (public talks); Pint of Science; PubHD; Scientific Culture Day; Science and Technology Week; European Researchers' Night; Other                                                                                                                                                                           |
|                                |                                | Q21. What type of geoscience communication initiatives have you participated in [Portuguese initiatives]?<br>Select: Living Science in Summer – Geology in Summer; Geologist's Day; European Geoparks Week; Mine Route Week, Other                                                                                                                                                                                                                                                                                           |
|                                | Contexts                       | In what contexts do you promote communication activities?<br>(Never; rarely; usually; often)<br>Q18.1 Formal (schools, universities, ...)<br>Q18.2 Informal (museums, geosites, protected areas,...)<br>Q18.3 Unconventional (market, shopping centre, street,...)<br>Q22. Indicate the four places in Portugal where you carried out more geoscience communication activities                                                                                                                                               |
| <b>Experiences / Practices</b> | Audiences                      | What audience do you usually communicate with?<br>(Never; rarely; usually; often)<br>Q13.1 Journalists<br>Q13.2 Science journalists<br>Q13.3 Students                                                                                                                                                                                                                                                                                                                                                                        |

|                                  |                                                                                                                                                                                                                                                                                                                                                                                                                                                                                                                                                                                          |
|----------------------------------|------------------------------------------------------------------------------------------------------------------------------------------------------------------------------------------------------------------------------------------------------------------------------------------------------------------------------------------------------------------------------------------------------------------------------------------------------------------------------------------------------------------------------------------------------------------------------------------|
|                                  | <p>Q13.4 Geosciences teachers</p> <p>Q13.5 Teachers (other fields)</p> <p>Q13.6 Geoscience technical professionals</p> <p>Q13.7 Technical professionals (other fields)</p> <p>Q13.8 Enterprises</p> <p>Q13.9 Researchers in Geosciences</p> <p>Q13.10 Researchers (other fields)</p> <p>Q13.11 Families</p> <p>Q13.12 Politicians</p> <p>Q13.13 NGOs</p> <p>Q13.14 Local communities</p> <p>Q13.15 'General Public'</p>                                                                                                                                                                  |
| Peer communication               | <p>What kind of science communication activities do you do, targeted at peers?<br/>(Never; rarely; usually; often)</p> <p>Q14.1 Scientific meetings and congresses</p> <p>Q14.2 Scientific publications</p> <p>Q14.3 Use of Academia platform</p> <p>Q14.4 Use of LinkedIn Platform</p> <p>Q14.5 Use of Researchgate Platform</p> <p>Q14.6 Participation in online forums</p> <p>Q28. Have you participated in scientific meetings/congress sessions dedicated to Science Communication? Yes, no</p> <p>Q29. Have you made scientific publications on science communication? Yes, no</p> |
| Institutional communication      | <p>How do you participate in the communication of your institution (newsletter, internal newspaper, website, social media, etc.)?<br/>(Never; rarely; usually; often)</p> <p>Q15.1 Sending scientific content</p> <p>Q15.2 Sending papers and recent research results</p> <p>Q15.3 Disseminating the participation in scientific events</p> <p>Q15.4 Disseminating of science communication activities</p>                                                                                                                                                                               |
| Communication with policy makers | <p>What kind of science communication activities do you do, targeted at policy makers?<br/>(Never; rarely; usually; often)</p> <p>Q16.1 Clarification sessions</p> <p>Q16.2 Meetings</p> <p>Q16.3 Non-technical reports</p>                                                                                                                                                                                                                                                                                                                                                              |
| Media                            | <p>What kind of science communication activities do you do, targeted at media?<br/>(Never; rarely; usually; often)</p> <p>Q17.1 Give an interview for the media (newspaper, radio or TV)</p> <p>Q17.2 Participation in media debate</p> <p>Q17.3 Sending a scientific press release</p> <p>Q17.4 Text production for popular science magazines</p> <p>Q17.5 Making opinion texts for non-specialist media</p> <p>Q17.6 Support journalists in clarifying scientific questions</p>                                                                                                        |
| Participatory contexts           | <p>Have you performed any of the following science communication activities?<br/>(Never; 1 time; 2-3; more than 4 times)</p> <p>Q19.1 Citizen Science Activity</p> <p>Q19.2 Public clarification session</p> <p>Q19.3 Debate with local communities</p> <p>Q19.4 Focus groups</p>                                                                                                                                                                                                                                                                                                        |
| Geoparks                         | <p>Q23. Have you already carried out any communication actions in a Geopark in Portugal? Yes, no</p> <p>Q24. If you answered yes to the previous question (Q23), indicate which one(s)?</p>                                                                                                                                                                                                                                                                                                                                                                                              |
| Online platforms                 | <p>Which online platforms do you use to communicate science?<br/>(Never; rarely; usually; often)</p> <p>Q25.1 Email</p> <p>Q25.2 Personal blog</p> <p>Q25.3 Institutional blog</p> <p>Q25.4 Personal website</p> <p>Q25.5 Institutional website</p> <p>Q25.6 Facebook (personal account)</p> <p>Q25.7 Facebook (institutional account)</p> <p>Q25.8 Twitter (personal account)</p>                                                                                                                                                                                                       |

|                                      |                                        |                                                                                                                                                                                                                                                                                                                                                                                                                                                                                                                                                                                                                                                                                                                                                                                                                                             |
|--------------------------------------|----------------------------------------|---------------------------------------------------------------------------------------------------------------------------------------------------------------------------------------------------------------------------------------------------------------------------------------------------------------------------------------------------------------------------------------------------------------------------------------------------------------------------------------------------------------------------------------------------------------------------------------------------------------------------------------------------------------------------------------------------------------------------------------------------------------------------------------------------------------------------------------------|
|                                      |                                        | Q25.9 Twitter (institutional account)<br>Q25.10 YouTube (personal account)<br>Q25.11 YouTube (institutional account)<br>Q25.12 Instagram (personal account)<br>Q25.13 Instagram (institutional account)                                                                                                                                                                                                                                                                                                                                                                                                                                                                                                                                                                                                                                     |
|                                      |                                        | What content related to Geosciences do you share on your social media?<br>(Never; rarely; usually; often)<br><br>Q26.1 Information related to work at my institution<br>Q26.2 Information related to places where I do fieldwork<br>Q26.3 Events in which I participate<br>Q26.4 Events in my area that I find interesting, even if I don't participate<br>Q26.5 News related to my work<br>Q26.6 News related to colleagues I know<br>Q26.7 Geoscience news that I find interesting<br>Q26.8 Clarifications and opinions in discussion groups                                                                                                                                                                                                                                                                                              |
|                                      | Geoscientific topics                   | Q27. Indicate three geosciences topics on which you do communication activities.                                                                                                                                                                                                                                                                                                                                                                                                                                                                                                                                                                                                                                                                                                                                                            |
| <b>Representations / Perceptions</b> |                                        |                                                                                                                                                                                                                                                                                                                                                                                                                                                                                                                                                                                                                                                                                                                                                                                                                                             |
| <b>Representations / Perceptions</b> | Perception of personal preparation     | Q30.1 Do you feel with the necessary skills to communicate science?<br>Q30.2 Do you feel prepared to communicate about the social and ethical implications of science?<br>(Not prepared at all; moderately prepared; well prepared; very well prepared; I don't know)                                                                                                                                                                                                                                                                                                                                                                                                                                                                                                                                                                       |
|                                      | Position on responsibility             | In your opinion,<br>(Strongly disagree; moderately disagree; neither agree nor disagree; moderately agree; strongly agree)<br><br>Q36.2 do scientists have a moral duty to engage with the non-expert public about the social and ethical implications of their work?<br>Q36.5 would you like to be forced to take a public position on the issues raised by your work?                                                                                                                                                                                                                                                                                                                                                                                                                                                                     |
|                                      | Interest in training                   | Q31. How willing would you be to attend training on communication with journalists and the public? Very willing; moderately willing, not willing at all                                                                                                                                                                                                                                                                                                                                                                                                                                                                                                                                                                                                                                                                                     |
|                                      | Time                                   | Q32. Regarding your entire professional activity, how important is it for you to find time to engage with non-specialist audiences? Not at all important; not very important; equally important; quite important; very important                                                                                                                                                                                                                                                                                                                                                                                                                                                                                                                                                                                                            |
|                                      | Institution attitude                   | Q33. To what degree does your institution value communication activities? High; medium; low                                                                                                                                                                                                                                                                                                                                                                                                                                                                                                                                                                                                                                                                                                                                                 |
|                                      | Objectives                             | What are your goals when you communicate science?<br>(Disagree; moderately agree; strongly agree)<br>Q34.1 to make the importance of geosciences in everyday life known<br>Q34.2 to show that geosciences are interesting<br>Q34.3 to share my passion for geosciences<br>Q34.4 to ensure that the public is better informed about science and technology<br>Q34.5 to enable citizens to make more informed decisions<br>Q34.6 to transmit the values of science<br>Q34.7 to support policy makers<br>Q34.8 to know people's opinion on geoscientific topics<br>Q34.9 to make my work known<br>Q34.10 to contribute to public debates about science<br>Q34.11 to know the implication of geosciences and of my work in citizens' life<br>Q34.12 to attract professionals to my area<br>Q34.13 to promote the public image of my institution |
|                                      | Motivations                            | Why do you do science communication?<br>(Disagree; moderately agree; strongly agree)<br>Q35.1 It is part of my professional duties<br>Q35.2 To attract research funding<br>Q35.3 Because funded research projects require<br>Q35.4 To respond the requests of my institution<br>Q35.5 To respond to invitations (colleagues, journalists, teachers, entities)<br>Q35.6 It is scientist's duty                                                                                                                                                                                                                                                                                                                                                                                                                                               |
|                                      | Perceptions about the scientific field | In your opinion:<br>Strongly disagree; moderately disagree; neither agree nor disagree; moderately agree; strongly agree                                                                                                                                                                                                                                                                                                                                                                                                                                                                                                                                                                                                                                                                                                                    |

|                                         |                                                                                                                                                                                                                                                                                                                                                                                                                                                                                                                                                                                                                                                                                                                                                                                                                                                                                                                                                               |
|-----------------------------------------|---------------------------------------------------------------------------------------------------------------------------------------------------------------------------------------------------------------------------------------------------------------------------------------------------------------------------------------------------------------------------------------------------------------------------------------------------------------------------------------------------------------------------------------------------------------------------------------------------------------------------------------------------------------------------------------------------------------------------------------------------------------------------------------------------------------------------------------------------------------------------------------------------------------------------------------------------------------|
|                                         | <p>Q36.1 Has your work implications for society and/or policy makers?</p> <p>Q36.3 Is your work interesting to non-specialist audiences?</p> <p>Q36.4 Is your work too specialized to make sense to non-specialist audiences?</p>                                                                                                                                                                                                                                                                                                                                                                                                                                                                                                                                                                                                                                                                                                                             |
| Obstacles                               | <p>What obstacles do you find in the science communication?<br/>(Disagree; moderately agree; strongly agree)</p> <p>Q37.1 lack of time</p> <p>Q37.2 lack of financial support</p> <p>Q37.3 discomfort in communicating with lay audiences</p> <p>Q37.4 lack of preparation/training</p> <p>Q37.5 lack of public interest</p> <p>Q37.6 lack of public knowledge</p> <p>Q37.7 negative opinion by peers</p> <p>Q37.8 these activities make science less rigorous</p> <p>Q37.9 the complexity of my scientific field</p> <p>Q37.10 fear of creating misunderstandings and generating controversy</p> <p>Q37.11 misrepresentation of scientific content by journalists</p>                                                                                                                                                                                                                                                                                        |
| Perception on geoscientific topics      | <p>Which geoscience topic do you consider:</p> <p>Q38 most pertinent to communicate?</p> <p>Q39 most difficult to communicate?</p> <p>Q40 easier to communicate?</p> <p>Q41 more attractive to communicate?</p>                                                                                                                                                                                                                                                                                                                                                                                                                                                                                                                                                                                                                                                                                                                                               |
| Effectiveness of communication channels | <p>Q42 List the most effective communication channels in science communication<br/>(List from 1-12)</p> <p>Book, Leaflet/Brochure, Panel, Interactive module, Game, Video, Social media post, News in the media, Scientific paper, Popular science article, Public debate, TV interview</p>                                                                                                                                                                                                                                                                                                                                                                                                                                                                                                                                                                                                                                                                   |
| Media                                   | <p>In your opinion:<br/>(Strongly disagree; moderately disagree; neither agree nor disagree; moderately agree; strongly agree)</p> <p>Q43.1 The news coverage on geoscience is adequate.</p> <p>Q43.2 The media are more interested in negative stories about geoscience.</p> <p>Q43.3 The media are more interested in sensationalism than scientific truth.</p> <p>Q43.4 Geosciences are too complex to be communicated in the media.</p> <p>Q43.5 Journalists are not scientifically prepared to work on geoscience topics.</p> <p>Q43.6 Journalists do not correctly understand the technical details of science.</p> <p>Q43.7 Most geoscientists fail to adapt their speech for journalists and for the public.</p> <p>Q36.6 In your opinion, engagement with non-specialist audiences is better done by trained professionals and journalists? Strongly disagree; moderately disagree; neither agree nor disagree; moderately agree; strongly agree</p> |
| Trust in information                    | <p>Which entities do you trust to do geosciences communication<br/>(I don't trust; I trust a little; I trust; I trust a lot)</p> <p>Q44.1 Museums</p> <p>Q44.2 Science Centres</p> <p>Q44.3 Universities</p> <p>Q44.4 Geoparks</p> <p>Q44.5 City councils</p> <p>Q44.6 Governmental institutions</p> <p>Q44.7 Elementary and secondary schools</p> <p>Q44.8 TV</p> <p>Q44.9 Newspapers</p> <p>Q44.10 Popular science magazines</p>                                                                                                                                                                                                                                                                                                                                                                                                                                                                                                                            |
| Personal experience and satisfaction    | <p>Q36.7 In your opinion, engaging non-specialist audiences in science is personally rewarding. Strongly disagree; moderately disagree; neither agree nor disagree; moderately agree; strongly agree</p> <p>Q45. What do you think about the number of activities you do annually? Reduced; fair; good; very good; excessive</p> <p>Q46. How do you rate your communicator experience? Unsatisfactory; few satisfactory; satisfactory; very satisfactory</p>                                                                                                                                                                                                                                                                                                                                                                                                                                                                                                  |

\* The results referring to the 30 indicators studied in the scope of this work are available in supplementary material D.

\*\* For convenience of statistical analysis some results were recoded for the present study, as in the supplementary material B and C.

Supplementary Material B

Statistic model

Frequencies

|           |                                                                                                                                                                                                                                                                                                                                                                                                                                                                                                                                                                                                  |             |
|-----------|--------------------------------------------------------------------------------------------------------------------------------------------------------------------------------------------------------------------------------------------------------------------------------------------------------------------------------------------------------------------------------------------------------------------------------------------------------------------------------------------------------------------------------------------------------------------------------------------------|-------------|
| Syntax    | FREQUENCIES<br>VARIABLES=Q10_Training Q12_Activities<br>Q1_Age Q23_Geoparks<br>Q2_Gender<br>Q30.1_Skills<br>Q31_training<br>Q33_Appreciation<br>Q36.1_implications_Society<br>Q37.10_Controversy<br><br>Q37.11_Misrepresentations<br>Q37.1_Lack_Time<br>Q37.2_Lack_Support<br>Q37.3_Discomfort<br>Q37.4_Lack_Training<br>Q37.5Lack_interest<br>Q37.6_Lack_Knowledge<br>Q37.7_Negative_Opinion<br>Q37.8_Pouco_Rigor<br><br>Q37.9_Topic_Complexity<br>Q45_Number_Activities<br>Q46_SciCom_Experience<br>Q5_Expertise<br><br>Q7_Professional_category<br>Q9_Work_Experience<br><br>/ORDER=ANALYSIS. |             |
| Resources | Processor Time                                                                                                                                                                                                                                                                                                                                                                                                                                                                                                                                                                                   | 00:00:00,05 |
|           | Elapsed Time                                                                                                                                                                                                                                                                                                                                                                                                                                                                                                                                                                                     | 00:00:00,01 |

---

*Statistics*

|   |         | Q10_Trainin<br>g | Q12_Activiti<br>es | Q1_Age | Q23_Geopar<br>ks | Q2_Gender |
|---|---------|------------------|--------------------|--------|------------------|-----------|
| N | Valid   | 179              | 179                | 179    | 178              | 179       |
|   | Missing | 0                | 0                  | 0      | 1                | 0         |

*Statistics*

|   |         | Q30.1_Skills | Q31_training | Q33_Appreci<br>ation | Q36.1_implic<br>ations_Societ<br>y | Q37.10_Cont<br>roversy |
|---|---------|--------------|--------------|----------------------|------------------------------------|------------------------|
| N | Valid   | 178          | 179          | 179                  | 179                                | 179                    |
|   | Missing | 1            | 0            | 0                    | 0                                  | 0                      |

*Statistics*

|   |         | Q37.11_Misr<br>epresentation<br>s | Q37.1_Lack_<br>Time | Q37.2_Lack_<br>Support | Q37.3_Disco<br>mfort | Q37.4_Lack_<br>Training |
|---|---------|-----------------------------------|---------------------|------------------------|----------------------|-------------------------|
| N | Valid   | 179                               | 179                 | 179                    | 179                  | 179                     |
|   | Missing | 0                                 | 0                   | 0                      | 0                    | 0                       |

*Statistics*

|   |         | Q37.5Lack_i<br>nterest | Q37.6_Lack_<br>Knowledge | Q37.7_Negat<br>ive_Opinion | Q37.8_Pouco<br>_Rigor | Q37.9_Topic<br>_Complexity |
|---|---------|------------------------|--------------------------|----------------------------|-----------------------|----------------------------|
| N | Valid   | 179                    | 179                      | 179                        | 179                   | 179                        |
|   | Missing | 0                      | 0                        | 0                          | 0                     | 0                          |

*Statistics*

|   |         | Q45_Number<br>_Activities | Q46_SciCom<br>_Experience | Q5_Expertise | Q7_Professio<br>nal_category | Q9_Work_E<br>xperience |
|---|---------|---------------------------|---------------------------|--------------|------------------------------|------------------------|
| N | Valid   | 179                       | 179                       | 156          | 169                          | 179                    |
|   | Missing | 0                         | 0                         | 23           | 10                           | 0                      |

**Frequency Table***Q10\_Training*

| Frequency | Percent | Valid Percent | Cumulative<br>Percent |
|-----------|---------|---------------|-----------------------|
|-----------|---------|---------------|-----------------------|

|       |       |     |       |       |       |
|-------|-------|-----|-------|-------|-------|
| Valid | Yes   | 38  | 21,2  | 21,2  | 21,2  |
|       | No    | 141 | 78,8  | 78,8  | 100,0 |
|       | Total | 179 | 100,0 | 100,0 |       |

#### Q12\_Activities

|       |               | Frequency | Percent | Valid Percent | Cumulative<br>Percent |
|-------|---------------|-----------|---------|---------------|-----------------------|
| Valid | no_activities | 21        | 11,7    | 11,7          | 11,7                  |
|       | one_to_three  | 60        | 33,5    | 33,5          | 45,3                  |
|       | four_or_more  | 98        | 54,7    | 54,7          | 100,0                 |
|       | Total         | 179       | 100,0   | 100,0         |                       |

#### Q1\_Age

|       |       | Frequency | Percent | Valid Percent | Cumulative<br>Percent |
|-------|-------|-----------|---------|---------------|-----------------------|
| Valid | <30   | 29        | 16,2    | 16,2          | 16,2                  |
|       | 30-40 | 50        | 27,9    | 27,9          | 44,1                  |
|       | 41-50 | 41        | 22,9    | 22,9          | 67,0                  |
|       | >51   | 59        | 33,0    | 33,0          | 100,0                 |
|       | Total | 179       | 100,0   | 100,0         |                       |

#### Q23\_Geoparks

|         |        | Frequency | Percent | Valid Percent | Cumulative<br>Percent |
|---------|--------|-----------|---------|---------------|-----------------------|
| Valid   | Yes    | 47        | 26,3    | 26,4          | 26,4                  |
|         | No     | 131       | 73,2    | 73,6          | 100,0                 |
|         | Total  | 178       | 99,4    | 100,0         |                       |
| Missing | System | 1         | ,6      |               |                       |
| Total   |        | 179       | 100,0   |               |                       |

#### Q2\_Gender

|       |   | Frequency | Percent | Valid Percent | Cumulative<br>Percent |
|-------|---|-----------|---------|---------------|-----------------------|
| Valid | M | 86        | 48,0    | 48,0          | 48,0                  |
|       | F | 93        | 52,0    | 52,0          | 100,0                 |



|  |       |     |       |       |
|--|-------|-----|-------|-------|
|  | Total | 179 | 100,0 | 100,0 |
|--|-------|-----|-------|-------|

### Q30.1\_Skills

|         |        | Frequency | Percent | Valid Percent | Cumulative<br>Percent |
|---------|--------|-----------|---------|---------------|-----------------------|
| Valid   | No     | 10        | 5,6     | 5,6           | 5,6                   |
|         | Just   | 76        | 42,5    | 42,7          | 48,3                  |
|         | Fairly | 92        | 51,4    | 51,7          | 100,0                 |
|         | Total  | 178       | 99,4    | 100,0         |                       |
| Missing | System | 1         | ,6      |               |                       |
| Total   |        | 179       | 100,0   |               |                       |

### Q31\_training

|       |       | Frequency | Percent | Valid Percent | Cumulative<br>Percent |
|-------|-------|-----------|---------|---------------|-----------------------|
| Valid | 1     | 95        | 53,1    | 53,1          | 53,1                  |
|       | 2     | 73        | 40,8    | 40,8          | 93,9                  |
|       | 3     | 11        | 6,1     | 6,1           | 100,0                 |
|       | Total | 179       | 100,0   | 100,0         |                       |

### Q33\_Appreciation

|       |       | Frequency | Percent | Valid Percent | Cumulative<br>Percent |
|-------|-------|-----------|---------|---------------|-----------------------|
| Valid | 1     | 80        | 44,7    | 44,7          | 44,7                  |
|       | 2     | 73        | 40,8    | 40,8          | 85,5                  |
|       | 3     | 26        | 14,5    | 14,5          | 100,0                 |
|       | Total | 179       | 100,0   | 100,0         |                       |

### Q36.1\_implications\_Society

|       |       | Frequency | Percent | Valid Percent | Cumulative<br>Percent |
|-------|-------|-----------|---------|---------------|-----------------------|
| Valid | 1     | 10        | 5,6     | 5,6           | 5,6                   |
|       | 2     | 16        | 8,9     | 8,9           | 14,5                  |
|       | 3     | 153       | 85,5    | 85,5          | 100,0                 |
|       | Total | 179       | 100,0   | 100,0         |                       |

Q37.10\_Controversy

|       |       | Frequency | Percent | Valid Percent | Cumulative<br>Percent |
|-------|-------|-----------|---------|---------------|-----------------------|
| Valid | 1     | 114       | 63,7    | 63,7          | 63,7                  |
|       | 2     | 47        | 26,3    | 26,3          | 89,9                  |
|       | 3     | 18        | 10,1    | 10,1          | 100,0                 |
|       | Total | 179       | 100,0   | 100,0         |                       |

Q37.11\_Misrepresentations

|       |       | Frequency | Percent | Valid Percent | Cumulative<br>Percent |
|-------|-------|-----------|---------|---------------|-----------------------|
| Valid | 1     | 46        | 25,7    | 25,7          | 25,7                  |
|       | 2     | 78        | 43,6    | 43,6          | 69,3                  |
|       | 3     | 55        | 30,7    | 30,7          | 100,0                 |
|       | Total | 179       | 100,0   | 100,0         |                       |

Q37.1\_Lack\_Time

|       |       | Frequency | Percent | Valid Percent | Cumulative<br>Percent |
|-------|-------|-----------|---------|---------------|-----------------------|
| Valid | 1     | 32        | 17,9    | 17,9          | 17,9                  |
|       | 2     | 98        | 54,7    | 54,7          | 72,6                  |
|       | 3     | 49        | 27,4    | 27,4          | 100,0                 |
|       | Total | 179       | 100,0   | 100,0         |                       |

Q37.2\_Lack\_Support

|       |       | Frequency | Percent | Valid Percent | Cumulative<br>Percent |
|-------|-------|-----------|---------|---------------|-----------------------|
| Valid | 1     | 23        | 12,8    | 12,8          | 12,8                  |
|       | 2     | 72        | 40,2    | 40,2          | 53,1                  |
|       | 3     | 84        | 46,9    | 46,9          | 100,0                 |
|       | Total | 179       | 100,0   | 100,0         |                       |

Q37.3\_Discomfort

|       |          | Frequency | Percent | Valid Percent | Cumulative Percent |
|-------|----------|-----------|---------|---------------|--------------------|
| Valid | Disagree | 113       | 63,1    | 63,1          | 63,1               |
|       | Agree    | 53        | 29,6    | 29,6          | 92,7               |
|       | 3        | 13        | 7,3     | 7,3           | 100,0              |
|       | Total    | 179       | 100,0   | 100,0         |                    |

#### Q37.4\_Lack\_Training

|       |       | Frequency | Percent | Valid Percent | Cumulative Percent |
|-------|-------|-----------|---------|---------------|--------------------|
| Valid | 1     | 78        | 43,6    | 43,6          | 43,6               |
|       | 2     | 76        | 42,5    | 42,5          | 86,0               |
|       | 3     | 25        | 14,0    | 14,0          | 100,0              |
|       | Total | 179       | 100,0   | 100,0         |                    |

#### Q37.5Lack\_interest

|       |       | Frequency | Percent | Valid Percent | Cumulative Percent |
|-------|-------|-----------|---------|---------------|--------------------|
| Valid | 1     | 64        | 35,8    | 35,8          | 35,8               |
|       | 2     | 91        | 50,8    | 50,8          | 86,6               |
|       | 3     | 24        | 13,4    | 13,4          | 100,0              |
|       | Total | 179       | 100,0   | 100,0         |                    |

#### Q37.6\_Lack\_Knowledge

|       |       | Frequency | Percent | Valid Percent | Cumulative Percent |
|-------|-------|-----------|---------|---------------|--------------------|
| Valid | 1     | 70        | 39,1    | 39,1          | 39,1               |
|       | 2     | 78        | 43,6    | 43,6          | 82,7               |
|       | 3     | 31        | 17,3    | 17,3          | 100,0              |
|       | Total | 179       | 100,0   | 100,0         |                    |

#### Q37.7\_Negative\_Opinion

|       |   | Frequency | Percent | Valid Percent | Cumulative Percent |
|-------|---|-----------|---------|---------------|--------------------|
| Valid | 1 | 102       | 57,0    | 57,0          | 57,0               |

|  |       |     |       |       |       |
|--|-------|-----|-------|-------|-------|
|  | 2     | 52  | 29,1  | 29,1  | 86,0  |
|  | 3     | 25  | 14,0  | 14,0  | 100,0 |
|  | Total | 179 | 100,0 | 100,0 |       |

Q37.8\_Pouco\_Rigor

|       |       | Frequency | Percent | Valid Percent | Cumulative<br>Percent |
|-------|-------|-----------|---------|---------------|-----------------------|
| Valid | 1     | 152       | 84,9    | 84,9          | 84,9                  |
|       | 2     | 22        | 12,3    | 12,3          | 97,2                  |
|       | 3     | 5         | 2,8     | 2,8           | 100,0                 |
|       | Total | 179       | 100,0   | 100,0         |                       |

Q37.9\_Topic\_Complexity

|       |       | Frequency | Percent | Valid Percent | Cumulative<br>Percent |
|-------|-------|-----------|---------|---------------|-----------------------|
| Valid | 1     | 115       | 64,2    | 64,2          | 64,2                  |
|       | 2     | 53        | 29,6    | 29,6          | 93,9                  |
|       | 3     | 11        | 6,1     | 6,1           | 100,0                 |
|       | Total | 179       | 100,0   | 100,0         |                       |

Q45\_Number\_Activities

|       |       | Frequency | Percent | Valid Percent | Cumulative<br>Percent |
|-------|-------|-----------|---------|---------------|-----------------------|
| Valid | 1     | 72        | 40,2    | 40,2          | 40,2                  |
|       | 2     | 85        | 47,5    | 47,5          | 87,7                  |
|       | 3     | 22        | 12,3    | 12,3          | 100,0                 |
|       | Total | 179       | 100,0   | 100,0         |                       |

Q46\_SciCom\_Experience

|       |       | Frequency | Percent | Valid Percent | Cumulative<br>Percent |
|-------|-------|-----------|---------|---------------|-----------------------|
| Valid | 1     | 43        | 24,0    | 24,0          | 24,0                  |
|       | 2     | 88        | 49,2    | 49,2          | 73,2                  |
|       | 3     | 48        | 26,8    | 26,8          | 100,0                 |
|       | Total | 179       | 100,0   | 100,0         |                       |

Q5\_Expertise

|         |                                                              | Frequency | Percent | Valid Percent | Cumulative<br>Percent |
|---------|--------------------------------------------------------------|-----------|---------|---------------|-----------------------|
| Valid   | Geological and Energy Resources                              | 36        | 20,1    | 23,1          | 23,1                  |
|         | Internal Geodynamics, Geophysics, Petrology and Geochemistry | 34        | 19,0    | 21,8          | 44,9                  |
|         | External Geodynamics and Palaeontology                       | 25        | 14,0    | 16,0          | 60,9                  |
|         | Geoconservation and Geotourism                               | 13        | 7,3     | 8,3           | 69,2                  |
|         | History and Education                                        | 28        | 15,6    | 17,9          | 87,2                  |
|         | Environment, Environmental Geology and Engineering           | 20        | 11,2    | 12,8          | 100,0                 |
|         | Geology                                                      |           |         |               |                       |
|         | Total                                                        | 156       | 87,2    | 100,0         |                       |
| Missing | System                                                       | 23        | 12,8    |               |                       |
| Total   |                                                              | 179       | 100,0   |               |                       |

Q7\_Professional\_category

|         |                 | Frequency | Percent | Valid Percent | Cumulative<br>Percent |
|---------|-----------------|-----------|---------|---------------|-----------------------|
| Valid   | PostGradStudent | 20        | 11,2    | 11,8          | 11,8                  |
|         | Technician      | 50        | 27,9    | 29,6          | 41,4                  |
|         | Researcher      | 66        | 36,9    | 39,1          | 80,5                  |
|         | Teacher         | 33        | 18,4    | 19,5          | 100,0                 |
|         | Total           | 169       | 94,4    | 100,0         |                       |
| Missing | System          | 10        | 5,6     |               |                       |
| Total   |                 | 179       | 100,0   |               |                       |

Q9\_Work\_Experience

|       |    | Frequency | Percent | Valid Percent | Cumulative<br>Percent |
|-------|----|-----------|---------|---------------|-----------------------|
| Valid | <5 | 38        | 21,2    | 21,2          | 21,2                  |

|       |     |       |       |       |
|-------|-----|-------|-------|-------|
| 5-10  | 17  | 9,5   | 9,5   | 30,7  |
| 10-20 | 45  | 25,1  | 25,1  | 55,9  |
| >20   | 79  | 44,1  | 44,1  | 100,0 |
| Total | 179 | 100,0 | 100,0 |       |

```

NOMREG Q12_Activities (BASE=LAST ORDER=ASCENDING) BY Q9_Work_Experience
Q33_Appreciation
      Q37.2_Lack_Support Q46_SciCom_Experience Q5_Expertise
/CRITERIA CIN(95) DELTA(0) MXITER(100) MXSTEP(5) CHKSEP(20) LCONVERGE(0)
PCONVERGE(0.000001)
      SINGULAR(0.00000001)
/MODEL
/STEPWISE=PIN(.05) POUT(0.1) MINEFFECT(0) RULE(SINGLE) ENTRYMETHOD(LR)
REMOVALMETHOD(LR)
/INTERCEPT=INCLUDE
/PRINT=CLASSTABLE FIT PARAMETER SUMMARY LRT CPS MFI.

```

### Nominal Regression

Missing Value  
Handling

Definition of Missing

User-defined missing  
values are treated as  
missing.

Cases Used

Statistics are based on  
all cases with valid data  
for all variables in the  
model.

Syntax

```
NOMREG
Q12_Activities
(BASE=LAST
ORDER=ASCENDING
) BY
Q9_Work_Experience
Q33_Appreciation

Q37.2_Lack_Support
Q46_SciCom_Experience Q5_Expertise
/CRITERIA CIN(95)
DELTA(0)
MXITER(100)
MXSTEP(5)
CHKSEP(20)
LCONVERGE(0)
PCONVERGE(0.000001)

SINGULAR(0.00000001)
/MODEL

/STEPWISE=PIN(.05)
POUT(0.1)
MINEFFECT(0)
RULE(SINGLE)
ENTRYMETHOD(LR)
REMOVALMETHOD(LR)

/INTERCEPT=INCLUDE

/PRINT=CLASSTABLE FIT PARAMETER
SUMMARY LRT CPS
MFI.
```

|           |                |             |
|-----------|----------------|-------------|
| Resources | Processor Time | 00:00:00,03 |
|           | Elapsed Time   | 00:00:00,03 |

---

*Case Processing Summary*

|                       |                                                                    | N                | Marginal<br>Percentage |
|-----------------------|--------------------------------------------------------------------|------------------|------------------------|
| Q12_Activities        | no_activities                                                      | 18               | 11,5%                  |
|                       | one_to_three                                                       | 55               | 35,3%                  |
|                       | four_or_more                                                       | 83               | 53,2%                  |
| Q9_Work_Experience    | <5                                                                 | 29               | 18,6%                  |
|                       | 5-10                                                               | 13               | 8,3%                   |
|                       | 10-20                                                              | 39               | 25,0%                  |
|                       | >20                                                                | 75               | 48,1%                  |
| Q33_Appreciation      | 1                                                                  | 67               | 42,9%                  |
|                       | 2                                                                  | 66               | 42,3%                  |
|                       | 3                                                                  | 23               | 14,7%                  |
| Q37.2_Lack_Support    | 1                                                                  | 21               | 13,5%                  |
|                       | 2                                                                  | 64               | 41,0%                  |
|                       | 3                                                                  | 71               | 45,5%                  |
| Q46_SciCom_Experience | 1                                                                  | 37               | 23,7%                  |
|                       | 2                                                                  | 78               | 50,0%                  |
|                       | 3                                                                  | 41               | 26,3%                  |
| Q5_Expertise          | Geological and Energy<br>Resources                                 | 36               | 23,1%                  |
|                       | Internal Geodynamics,<br>Geophysics, Petrology<br>and Geochemistry | 34               | 21,8%                  |
|                       | External Geodynamics<br>and Palaeontology                          | 25               | 16,0%                  |
|                       | Geoconservation and<br>Geotourism                                  | 13               | 8,3%                   |
|                       | Geoconservation and<br>Geotourism                                  | 28               | 17,9%                  |
|                       | Environment,<br>Environmental Geology<br>and Engineering           | 20               | 12,8%                  |
|                       | Geology                                                            |                  |                        |
|                       |                                                                    |                  |                        |
|                       |                                                                    |                  |                        |
| Valid                 |                                                                    | 156              | 100,0%                 |
| Missing               |                                                                    | 23               |                        |
| Total                 |                                                                    | 179              |                        |
| Subpopulation         |                                                                    | 129 <sup>a</sup> |                        |



a. The dependent variable has only one value observed in 117 (90,7%) subpopulations.

#### *Model Fitting Information*

| Model          | Model Fitting     |                        |    |      |
|----------------|-------------------|------------------------|----|------|
|                | Criteria          | Likelihood Ratio Tests |    |      |
|                | -2 Log Likelihood | Chi-Square             | df | Sig. |
| Intercept Only | 276,948           |                        |    |      |
| Final          | 166,127           | 110,821                | 28 | ,000 |

#### *Goodness-of-Fit*

|          | Chi-Square | df  | Sig.  |
|----------|------------|-----|-------|
| Pearson  | 167,711    | 228 | ,999  |
| Deviance | 148,576    | 228 | 1,000 |

#### *Pseudo R-Square*

|               |      |
|---------------|------|
| Cox and Snell | ,509 |
| Nagelkerke    | ,597 |
| McFadden      | ,373 |

#### *Likelihood Ratio Tests*

| Effect                | Model Fitting                      |                        |    |      |
|-----------------------|------------------------------------|------------------------|----|------|
|                       | Criteria                           | Likelihood Ratio Tests |    |      |
|                       | -2 Log Likelihood of Reduced Model | Chi-Square             | df | Sig. |
| Intercept             | 166,127 <sup>a</sup>               | ,000                   | 0  | .    |
| Q9_Work_Experience    | 191,617                            | 25,490                 | 6  | ,000 |
| Q33_Appreciation      | 186,938                            | 20,812                 | 4  | ,000 |
| Q37.2_Lack_Support    | 177,631                            | 11,504                 | 4  | ,021 |
| Q46_SciCom_Experience | 199,849                            | 33,722                 | 4  | ,000 |
| Q5_Expertise          | 189,771                            | 23,644                 | 10 | ,009 |

The chi-square statistic is the difference in -2 log-likelihoods between the final model and a reduced model. The reduced model is formed by omitting an effect from the final model. The null hypothesis is that all parameters of that effect are 0.

a. This reduced model is equivalent to the final model because omitting the effect does not increase the degrees of freedom.

*Parameter Estimates*

|                                              |                           | 95% Confidence Interval for<br>Exp(B) |            |       |    |      |        |             |             |
|----------------------------------------------|---------------------------|---------------------------------------|------------|-------|----|------|--------|-------------|-------------|
|                                              |                           | B                                     | Std. Error | Wald  | df | Sig. | Exp(B) | Lower Bound | Upper Bound |
| Q12_Activities <sup>a</sup><br>no_activities | Intercept                 | ,195                                  | 1,435      | ,018  | 1  | ,892 |        |             |             |
|                                              | [Q9_Work_Experience=1]    | 1,629                                 | 1,220      | 1,782 | 1  | ,182 | 5,097  | ,467        | 55,686      |
|                                              | [Q9_Work_Experience=2]    | 4,423                                 | 1,704      | 6,736 | 1  | ,009 | 83,377 | 2,953       | 2354,045    |
|                                              | [Q9_Work_Experience=3]    | -,122                                 | 1,107      | ,012  | 1  | ,912 | ,885   | ,101        | 7,750       |
|                                              | [Q9_Work_Experience=4]    | 0 <sup>b</sup>                        | .          | .     | 0  | .    | .      | .           | .           |
|                                              | [Q33_Appreciation=1]      | -5,395                                | 1,743      | 9,583 | 1  | ,002 | ,005   | ,000        | ,138        |
|                                              | [Q33_Appreciation=2]      | -2,006                                | ,987       | 4,133 | 1  | ,042 | ,135   | ,019        | ,930        |
|                                              | [Q33_Appreciation=3]      | 0 <sup>b</sup>                        | .          | .     | 0  | .    | .      | .           | .           |
|                                              | [Q37.2_Lack_Support=1]    | 1,760                                 | 1,234      | 2,036 | 1  | ,154 | 5,812  | ,518        | 65,223      |
|                                              | [Q37.2_Lack_Support=2]    | -,323                                 | ,868       | ,139  | 1  | ,710 | ,724   | ,132        | 3,968       |
|                                              | [Q37.2_Lack_Support=3]    | 0 <sup>b</sup>                        | .          | .     | 0  | .    | .      | .           | .           |
|                                              | [Q46_SciCom_Experience=1] | 2,886                                 | 1,219      | 5,604 | 1  | ,018 | 17,919 | 1,643       | 195,403     |
|                                              | [Q46_SciCom_Experience=2] | 1,037                                 | 1,033      | 1,009 | 1  | ,315 | 2,822  | ,373        | 21,367      |
|                                              | [Q46_SciCom_Experience=3] | 0 <sup>b</sup>                        | .          | .     | 0  | .    | .      | .           | .           |

|          |                               |                |              |            |   |      |               |              |                |
|----------|-------------------------------|----------------|--------------|------------|---|------|---------------|--------------|----------------|
|          | [Q5_Expertise<br>=1]          | -4,42<br>9     | 1,895        | 5,461      | 1 | ,019 | ,012          | ,000         | ,489           |
|          | [Q5_Expertise<br>=2]          | -1,58<br>0     | 1,191        | 1,758      | 1 | ,185 | ,206          | ,020         | 2,128          |
|          | [Q5_Expertise<br>=3]          | -21,7<br>07    | 9804,6<br>14 | ,000       | 1 | ,998 | 3,741E<br>-10 | ,000         | . <sup>c</sup> |
|          | [Q5_Expertise<br>=4]          | -20,6<br>09    | ,000         | .          | 1 | .    | 1,121E<br>-9  | 1,121E-<br>9 | 1,121E-<br>9   |
|          | [Q5_Expertise<br>=5]          | ,084           | 1,113        | ,006       | 1 | ,940 | 1,088         | ,123         | 9,640          |
|          | [Q5_Expertise<br>=6]          | 0 <sup>b</sup> | .            | .          | 0 | .    | .             | .            | .              |
| one_to_t | Intercept                     | -2,66<br>1     | 1,143        | 5,423      | 1 | ,020 |               |              |                |
| hree     | [Q9_Work_Ex<br>perience=1]    | -1,07<br>4     | ,679         | 2,502      | 1 | ,114 | ,342          | ,090         | 1,293          |
|          | [Q9_Work_Ex<br>perience=2]    | 3,731          | 1,283        | 8,457      | 1 | ,004 | 41,716        | 3,375        | 515,598        |
|          | [Q9_Work_Ex<br>perience=3]    | ,069           | ,565         | ,015       | 1 | ,902 | 1,072         | ,354         | 3,241          |
|          | [Q9_Work_Ex<br>perience=4]    | 0 <sup>b</sup> | .            | .          | 0 | .    | .             | .            | .              |
|          | [Q33_Apprecia<br>tion=1]      | -,301          | ,811         | ,137       | 1 | ,711 | ,740          | ,151         | 3,629          |
|          | [Q33_Apprecia<br>tion=2]      | ,288           | ,797         | ,131       | 1 | ,718 | 1,334         | ,280         | 6,368          |
|          | [Q33_Apprecia<br>tion=3]      | 0 <sup>b</sup> | .            | .          | 0 | .    | .             | .            | .              |
|          | [Q37.2_Lack_<br>Support=1]    | -1,56<br>8     | ,869         | 3,257      | 1 | ,071 | ,208          | ,038         | 1,144          |
|          | [Q37.2_Lack_<br>Support=2]    | -,417          | ,463         | ,812       | 1 | ,367 | ,659          | ,266         | 1,633          |
|          | [Q37.2_Lack_<br>Support=3]    | 0 <sup>b</sup> | .            | .          | 0 | .    | .             | .            | .              |
|          | [Q46_SciCom_<br>Experience=1] | 3,826          | ,791         | 23,37<br>1 | 1 | ,000 | 45,878        | 9,726        | 216,398        |
|          | [Q46_SciCom_<br>Experience=2] | 1,817          | ,622         | 8,532      | 1 | ,003 | 6,151         | 1,818        | 20,815         |
|          | [Q46_SciCom_<br>Experience=3] | 0 <sup>b</sup> | .            | .          | 0 | .    | .             | .            | .              |
|          | [Q5_Expertise<br>=1]          | ,275           | ,855         | ,104       | 1 | ,747 | 1,317         | ,247         | 7,036          |

|                      |                |       |       |   |      |       |      |        |
|----------------------|----------------|-------|-------|---|------|-------|------|--------|
| [Q5_Expertise<br>=2] | ,441           | ,819  | ,290  | 1 | ,590 | 1,554 | ,312 | 7,735  |
| [Q5_Expertise<br>=3] | ,750           | ,872  | ,739  | 1 | ,390 | 2,117 | ,383 | 11,696 |
| [Q5_Expertise<br>=4] | ,997           | 1,045 | ,910  | 1 | ,340 | 2,711 | ,349 | 21,040 |
| [Q5_Expertise<br>=5] | 1,675          | ,883  | 3,595 | 1 | ,058 | 5,338 | ,945 | 30,149 |
| [Q5_Expertise<br>=6] | 0 <sup>b</sup> | .     | .     | 0 | .    | .     | .    | .      |

a. The reference category is: four\_or\_more.

b. This parameter is set to zero because it is redundant.

c. Floating point overflow occurred while computing this statistic. Its value is therefore set to system missing.

### *Classification*

| Observed           | Predicted     |              |              | Percent<br>Correct |
|--------------------|---------------|--------------|--------------|--------------------|
|                    | no_activities | one_to_three | four_or_more |                    |
| no_activities      | 10            | 4            | 4            | 55,6%              |
| one_to_three       | 2             | 32           | 21           | 58,2%              |
| four_or_more       | 3             | 9            | 71           | 85,5%              |
| Overall Percentage | 9,6%          | 28,8%        | 61,5%        | 72,4%              |

**Supplementary Material C**  
Summary of the results of the demographic and descriptive analysis

| Demographics              |                                 |         |                                                              |         |                                         |         |                                            |         |                                                |         |                                                            |         |            |
|---------------------------|---------------------------------|---------|--------------------------------------------------------------|---------|-----------------------------------------|---------|--------------------------------------------|---------|------------------------------------------------|---------|------------------------------------------------------------|---------|------------|
|                           | < 30                            |         | 30-40                                                        |         | 40-50                                   |         | > 50 years old                             |         |                                                |         |                                                            |         |            |
| Q1. Age                   | 29                              | 0,16201 | 50                                                           | 0,27933 | 41                                      | 0,22905 | 59                                         | 0,32961 |                                                |         |                                                            |         |            |
|                           | Female                          |         | Male                                                         |         | Other                                   |         |                                            |         |                                                |         |                                                            |         |            |
| Q2. Gender                | 93                              | 0,51955 | 86                                                           | 0,48045 |                                         |         |                                            |         |                                                |         |                                                            |         |            |
|                           | Bachelor's                      |         | Master's                                                     |         | PhD                                     |         |                                            |         |                                                |         |                                                            |         |            |
| Q3. Academic degree       | 32                              | 0,17877 | 75                                                           | 0,41899 | 72                                      | 0,40223 |                                            |         |                                                |         |                                                            |         |            |
|                           | Geology                         |         | Biology and Geology; Environmental Sciences; Env. Education  |         | Geological Engineering/Mine Engineering |         | Biology                                    |         | Geophysics; Meteorology; Oceanography; Physics |         | Geography; Aerospace Engineering                           |         |            |
| Q4. Degree area           | 125                             | 0,69832 | 28                                                           | 0,15642 | 8                                       | 0,04469 | 8                                          | 0,04469 | 6                                              | 0,03352 | 4                                                          | 0,02235 |            |
|                           | Geological and Energy Resources |         | Internal Geodynamics, Geophysics, Petrology and Geochemistry |         | External Geodynamics and Palaeontology  |         | Geoconservation and Geotourism             |         | History and Education                          |         | Environment, Environmental Geology and Engineering Geology |         | Other      |
| Q5. Area of expertise     | 36                              | 0,20112 | 34                                                           | 0,18994 | 25                                      | 0,13966 | 13                                         | 0,07263 | 28                                             | 0,1676  | 20                                                         | 0,10615 | 23 0,12291 |
|                           | Technician                      |         | Higher education professor / Researcher                      |         |                                         |         | Elementary and secondary education teacher |         | Post graduation student                        |         | Other                                                      |         |            |
|                           |                                 |         | Higher education professor                                   |         | Researcher                              |         |                                            |         |                                                |         | Science communicator                                       |         | Other      |
| Q7. Professional category | 50                              | 0,27933 | 36                                                           | 0,20112 | 30                                      | 0,1676  | 33                                         | 0,18436 | 20                                             | 0,11173 | 7                                                          | 0,03911 | 3 0,01676  |

## Descriptive analysis

| Frequency                                                                                                                           |                 |          |                                   |          |                               |          |
|-------------------------------------------------------------------------------------------------------------------------------------|-----------------|----------|-----------------------------------|----------|-------------------------------|----------|
|                                                                                                                                     | <i>None</i>     |          | <i>1 - 3 activities</i>           |          | <i>More than 4 activities</i> |          |
| Q12. How many science communication activities have you carried out in the last year?                                               | 21              | 0,117318 | 60                                | 0,335196 | 98                            | 0,547486 |
| Institution attitude                                                                                                                |                 |          |                                   |          |                               |          |
|                                                                                                                                     | <i>High</i>     |          | <i>Medium</i>                     |          | <i>Low</i>                    |          |
| Q33. To what degree does your institution value communication activities?                                                           | 80              | 0,446927 | 73                                | 0,407821 | 26                            | 0,145251 |
| Perception about geoscientific area                                                                                                 |                 |          |                                   |          |                               |          |
|                                                                                                                                     | <i>Disagree</i> |          | <i>Neither agree nor disagree</i> |          | <i>Agree</i>                  |          |
| Q36.1 Has your work implications for society and/or policy makers?                                                                  | 10              | 0,055866 | 16                                | 0,089385 | 153                           | 0,854749 |
| Q36.2 do scientists have a moral duty to engage with the non-expert public about the social and ethical implications of their work? | 5               | 0,027933 | 13                                | 0,072626 | 161                           | 0,899441 |
| Q36.3 Is your work interesting to non-specialist audiences?                                                                         | 15              | 0,083799 | 23                                | 0,128492 | 141                           | 0,787709 |
| Q36.4 Is your work too specialized to make sense to non-specialist audiences?                                                       | 108             | 0,603352 | 29                                | 0,162011 | 42                            | 0,234637 |
| Obstacles to science communication                                                                                                  |                 |          |                                   |          |                               |          |
| What obstacles do you find in the science communication?                                                                            | <i>Disagree</i> |          | <i>Moderately agree</i>           |          | <i>Strongly agree</i>         |          |
| Q37.1 lack of time                                                                                                                  | 32              | 0,178771 | 98                                | 0,547486 | 49                            | 0,273743 |
| Q37.2 lack of financial support                                                                                                     | 23              | 0,128492 | 72                                | 0,402235 | 84                            | 0,469274 |
| Q37.3 discomfort in communicating with lay audiences                                                                                | 113             | 0,631285 | 53                                | 0,296089 | 13                            | 0,072626 |
| Q37.4 lack of preparation/training                                                                                                  | 78              | 0,435754 | 76                                | 0,424581 | 25                            | 0,139665 |
| Q37.5 lack of public interest                                                                                                       | 64              | 0,357542 | 91                                | 0,50838  | 24                            | 0,134078 |
| Q37.6 lack of public knowledge                                                                                                      | 70              | 0,391061 | 78                                | 0,435754 | 31                            | 0,173184 |
| Q37.7 negative opinion by peers                                                                                                     | 102             | 0,569832 | 52                                | 0,290503 | 25                            | 0,139665 |

|                                                                      |     |          |    |          |    |          |
|----------------------------------------------------------------------|-----|----------|----|----------|----|----------|
| Q37.8 these activities make science less rigorous                    | 152 | 0,849162 | 22 | 0,122905 | 5  | 0,027933 |
| Q37.9 the complexity of my scientific field                          | 115 | 0,642458 | 53 | 0,296089 | 11 | 0,061453 |
| Q37.10 fear of creating misunderstandings and generating controversy | 114 | 0,636872 | 47 | 0,26257  | 18 | 0,100559 |
| Q37.11 misrepresentation of scientific content by journalists        | 46  | 0,256983 | 78 | 0,435754 | 55 | 0,307263 |

#### Self-perceived competence

|                                                                                                 | <i>Not prepared</i> |          | <i>Moderately prepared</i> |          | <i>Well/very well prepared</i> |          |
|-------------------------------------------------------------------------------------------------|---------------------|----------|----------------------------|----------|--------------------------------|----------|
| Q30.1 Do you feel with the necessary skills to communicate science?                             | 10                  | 0,05618  | 76                         | 0,426966 | 92                             | 0,516854 |
| Q30.2 Do you feel prepared to communicate about the social and ethical implications of science? | 44                  | 0,247191 | 73                         | 0,410112 | 61                             | 0,342697 |

#### Personal satisfaction

|                                                                                                                                     | <i>Nothing/not very important</i> |          | <i>Equally important</i>          |          | <i>Quite/very important</i> |          |
|-------------------------------------------------------------------------------------------------------------------------------------|-----------------------------------|----------|-----------------------------------|----------|-----------------------------|----------|
| Q32. Regarding your entire professional activity, how important is it for you to find time to engage with non-specialist audiences? | 15                                | 0,083799 | 42                                | 0,234637 | 122                         | 0,681564 |
|                                                                                                                                     | <i>Disagree</i>                   |          | <i>Neither agree nor disagree</i> |          | <i>Agree</i>                |          |
| Q36.7 In your opinion, engaging non-specialist audiences in science is personally rewarding?                                        | 11                                | 0,061453 | 14                                | 0,078212 | 154                         | 0,860335 |
|                                                                                                                                     | <i>Reduced</i>                    |          | <i>Fair/Good</i>                  |          | <i>Very good/Excessive</i>  |          |
| Q45. What do you think about the number of activities you do annually?                                                              | 72                                | 0,402235 | 85                                | 0,47486  | 22                          | 0,123    |
|                                                                                                                                     | <i>Unsatisfactory</i>             |          | <i>Satisfactory</i>               |          | <i>Very satisfactory</i>    |          |
| Q46. How do you rate your communicator experience?                                                                                  | 43                                | 0,240223 | 88                                | 0,49162  | 48                          | 0,268156 |

#### Contact with journalists

|                           | <i>Often</i> |          | <i>Usually</i> |          | <i>Rarely</i> |          | <i>Never</i> |          |
|---------------------------|--------------|----------|----------------|----------|---------------|----------|--------------|----------|
| Q13.1 Journalists         | 5            | 0,027933 | 16             | 0,089385 | 71            | 0,396648 | 87           | 0,486034 |
| Q13.2 Science journalists | 3            | 0,01676  | 7              | 0,039106 | 82            | 0,458101 | 87           | 0,486034 |

|       | Q2     | Q3         | Q4                  | Q5                            | Q12   | Q13.1   | Q13.2  | Q30.1          | Q30.2          | Q32                | Q33    | Q36.1                | Q36.2                | Q36.3                | Q36.4                | Q36.7                | Q37.1     | Q37.2     | Q37.3     | Q37.4     | Q37.5     | Q37.6     | Q37.7     | Q37.8    | Q37.9    | Q37.10   | Q37.11   | Q45      | Q46       |              |              |              |
|-------|--------|------------|---------------------|-------------------------------|-------|---------|--------|----------------|----------------|--------------------|--------|----------------------|----------------------|----------------------|----------------------|----------------------|-----------|-----------|-----------|-----------|-----------|-----------|-----------|----------|----------|----------|----------|----------|-----------|--------------|--------------|--------------|
| > 50  | Male   | PhD        | Geology             | Geocns & Geot                 | 1 - 3 | Never   | Rarely | Well prepared  | Mod prepared   | Quite important    | High   | Strongly agree       | Strongly agree       | Moderately agree     | Moderately disagree  | Strongly agree       | Str agree | Mod agree | Disagree  | Disagree  | Mod agree | Mod agree | Disagree  | Disagree | Disagree | Disagree | Disagree | Disagree | Reduced   | Few satis    |              |              |
| > 50  | Male   | PhD        | Geology             | Environ & Eng Geology         | > 10  | Rarely  | Rarely | Well prepared  | Mod prepared   | Quite important    | High   | Moderately agree     | Strongly agree       | Moderately agree     | Moderately disagree  | Moderately agree     | Disagree  | Mod agree | Disagree  | Disagree  | Mod agree | Disagree  | Disagree  | Disagree | Disagree | Disagree | Disagree | Disagree | Good      | Very satisf  |              |              |
| 41-50 | Female | PhD        | Geology             | Environ & Eng Geology         | None  | Rarely  | Rarely | Very well prep | Well prepared  | Quite important    | Medium | Moderately agree     | Strongly agree       | Moderately agree     | N agree nor disagree | Moderately agree     | Mod agree | Str agree | Disagree  | Disagree  | Mod agree | Mod agree | Disagree  | Disagree | Disagree | Disagree | Disagree | Disagree | Very good | Very satisf  |              |              |
| < 30  | Male   | Master's   | Bio & Geol; Environ | Geo Energy Resources          | 1 - 3 | Rarely  | Never  | Mod prepared   | Well prepared  | Equ important      | High   | Strongly agree       | Moderately agree     | Moderately agree     | Moderately disagree  | Moderately agree     | Mod agree | Str agree | Mod agree | Mod agree | Mod agree | Disagree  | Disagree  | Disagree | Disagree | Disagree | Disagree | Disagree | Reduced   | Unsatisf     |              |              |
| > 50  | Female | PhD        | Geology             | Hist & Educ                   | None  | Never   | Never  | Mod prepared   | Very well prep | Equ important      | Medium | Moderately agree     | Moderately agree     | Moderately agree     | Strongly disagree    | Moderately agree     | Disagree  | Disagree | Disagree | Disagree | Disagree | Disagree | Reduced   | Satisfactory |              |              |
| > 50  | Female | Master's   | Bio & Geol; Environ | Hist & Educ                   | > 10  | Never   | Never  | Well prepared  | Well prepared  | Very important     | High   | Moderately disagree  | Moderately agree     | Moderately agree     | Strongly disagree    | Strongly agree       | Mod agree | Str agree | Disagree  | Disagree  | Mod agree | Mod agree | Mod agree | Disagree | Disagree | Disagree | Disagree | Disagree | Disagree  | Fair         | Satisfactory |              |
| < 30  | Female | Master's   | Geol Min Eng        | Geo Energy Resources          | > 10  | Rarely  | Never  | Mod prepared   | Mod prepared   | Very important     | High   | Moderately agree     | Strongly agree       | Strongly agree       | Moderately disagree  | Strongly agree       | Mod agree | Str agree | Disagree  | Disagree  | Mod agree | Mod agree | Disagree  | Disagree | Disagree | Disagree | Disagree | Disagree | Disagree  | Very good    | Satisfactory |              |
| 30-40 | Male   | PhD        | Geology             | Ext Geod & Palaeont           | > 10  | Usually | Rarely | Very well prep | Very well prep | Very important     | High   | Strongly agree       | Strongly agree       | Strongly agree       | Strongly disagree    | Strongly agree       | Mod agree | Str agree | Mod agree | Mod agree | Mod agree | Mod agree | Disagree  | Disagree | Disagree | Disagree | Disagree | Disagree | Fair      | Very satisf  |              |              |
| 30-40 | Male   | Master's   | Geology             | Geo Energy Resources          | > 10  | Often   | Rarely | Very well prep | Very well prep | Very important     | High   | Strongly agree       | Strongly agree       | Strongly agree       | Moderately disagree  | Strongly agree       | Mod agree | Mod agree | Disagree  | Disagree  | Mod agree | Mod agree | Disagree  | Disagree | Disagree | Disagree | Disagree | Disagree | Disagree  | Very good    | Satisfactory |              |
| 30-40 | Female | Master's   | Geology             | Geocns & Geot                 | > 10  | Never   | Never  | Well prepared  | Well prepared  | Very important     | High   | Moderately agree     | Moderately agree     | N agree nor disagree | N agree nor disagree | Strongly agree       | Mod agree | Mod agree | Mod agree | Disagree  | Mod agree | Mod agree | Mod agree | Disagree | Disagree | Disagree | Disagree | Disagree | Disagree  | Fair         | Very satisf  |              |
| > 50  | Female | PhD        | Geology             | Int Geod, Geoph, Petrol Geoch | 4 - 9 | Never   | Rarely | Mod prepared   | Not prepared   | Very important     | Medium | N agree nor disagree | Strongly agree       | Strongly agree       | Moderately disagree  | Strongly agree       | Str agree | Str agree | Mod agree | Mod agree | Mod agree | Mod agree | Disagree  | Disagree | Disagree | Disagree | Disagree | Disagree | Disagree  | Good         | Satisfactory |              |
| > 50  | Male   | PhD        | Geology             | Int Geod, Geoph, Petrol Geoch | 4 - 9 | Rarely  | Rarely | Mod prepared   | Well prepared  | Quite important    | Medium | N agree nor disagree | Moderately agree     | Moderately disagree  | Moderately disagree  | Strongly agree       | Mod agree | Str agree | Disagree  | Disagree  | Mod agree | Disagree  | Disagree  | Disagree | Disagree | Disagree | Disagree | Disagree | Disagree  | Reduced      | Satisfactory |              |
| > 50  | Male   | PhD        | Geology             | Ext Geod & Palaeont           | 4 - 9 | Rarely  | Rarely | Well prepared  | Mod prepared   | Very important     | Medium | Moderately agree     | Strongly agree       | Strongly agree       | Moderately disagree  | Moderately agree     | Disagree  | Disagree | Disagree | Disagree | Disagree | Disagree | Disagree  | Good         | Very satisf  |              |
| > 50  | Female | PhD        | Biology             | Ext Geod & Palaeont           | 1 - 3 | Rarely  | Rarely | Well prepared  | Well prepared  | Very important     | High   | Moderately agree     | Strongly agree       | Strongly agree       | Strongly disagree    | Strongly agree       | Mod agree | Str agree | Disagree  | Disagree  | Mod agree | Mod agree | Disagree  | Disagree | Disagree | Disagree | Disagree | Disagree | Disagree  | Fair         | Satisfactory |              |
| < 30  | Male   | Bachelor's | Bio & Geol; Environ | Environ & Eng Geology         | > 10  | Rarely  | Never  | Well prepared  | Not prepared   | Very important     | High   | Moderately agree     | N agree nor disagree | Moderately agree     | N agree nor disagree | Moderately agree     | Mod agree | Str agree | Mod agree | Mod agree | Str agree | Str agree | Str agree | Disagree | Disagree | Disagree | Disagree | Disagree | Disagree  | Fair         | Satisfactory |              |
| 41-50 | Female | Master's   | Geology             | Geo Energy Resources          | 1 - 3 | Never   | Never  | Mod prepared   | Mod prepared   | Quite important    | Medium | Moderately agree     | Moderately agree     | Moderately agree     | Strongly disagree    | Strongly agree       | Mod agree | Mod agree | Mod agree | Mod agree | Disagree  | Mod agree | Disagree  | Disagree | Disagree | Disagree | Disagree | Disagree | Disagree  | Reduced      | Few satis    |              |
| 30-40 | Female | Bachelor's | Geology             | Environ & Eng Geology         | None  | Never   | Never  | Mod prepared   | Not prepared   | Not very important | Medium | Strongly agree       | Moderately agree     | Moderately agree     | Strongly disagree    | Strongly agree       | Mod agree | Mod agree | Mod agree | Mod agree | Mod agree | Mod agree | Disagree  | Disagree | Disagree | Disagree | Disagree | Disagree | Disagree  | Unsatisf     |              |              |
| 41-50 | Female | Master's   | Geology             | Environ & Eng Geology         | 1 - 3 | Never   | Never  | Mod prepared   | Not prepared   | Quite important    | High   | Moderately agree     | Moderately agree     | Moderately agree     | Strongly disagree    | Strongly agree       | Str agree | Str agree | Disagree  | Disagree  | Mod agree | Mod agree | Disagree  | Disagree | Disagree | Disagree | Disagree | Disagree | Fair      | Satisfactory |              |              |
| 41-50 | Female | PhD        | Geology             | Environ & Eng Geology         | 1 - 3 | Never   | Never  | Well prepared  | Mod prepared   | Very important     | Low    | Moderately agree     | Strongly agree       | Strongly agree       | Strongly disagree    | Strongly agree       | Mod agree | Str agree | Disagree  | Disagree  | Disagree  | Disagree  | Disagree  | Disagree | Disagree | Disagree | Disagree | Disagree | Reduced   | Satisfactory |              |              |
| 41-50 | Female | PhD        | Geology             | Geo Energy Resources          | 4 - 9 | Rarely  | Never  | Well prepared  | Mod prepared   | Equ important      | Medium | Moderately agree     | Strongly agree       | Strongly agree       | N agree nor disagree | N agree nor disagree | Str agree | Str agree | Disagree  | Disagree  | Mod agree | Mod agree | Disagree  | Disagree | Disagree | Disagree | Disagree | Disagree | Disagree  | Reduced      | Satisfactory |              |
| > 50  | Female | PhD        | Geology             | Geo Energy Resources          | 4 - 9 | Rarely  | Never  | Well prepared  | Mod prepared   | Equ important      | Medium | Moderately agree     | Strongly agree       | Strongly agree       | N agree nor disagree | N agree nor disagree | Str agree | Str agree | Disagree  | Disagree  | Mod agree | Mod agree | Disagree  | Disagree | Disagree | Disagree | Disagree | Disagree | Disagree  | Very good    | Satisfactory |              |
| 41-50 | Male   | PhD        | Geology             | Geo Energy Resources          | 1 - 3 | Never   | Never  | Well prepared  | Mod prepared   | Equ important      | Low    | Strongly agree       | Strongly agree       | Moderately agree     | Strongly disagree    | Strongly agree       | Mod agree | Str agree | Disagree  | Disagree  | Mod agree | Mod agree | Disagree  | Disagree | Disagree | Disagree | Disagree | Disagree | Disagree  | Reduced      | Satisfactory |              |
| 41-50 | Male   | Master's   | Geology             | Geo Energy Resources          | 1 - 3 | Never   | Never  | Well prepared  | Mod prepared   | Equ important      | Medium | Moderately agree     | Moderately agree     | Moderately agree     | Strongly disagree    | Strongly agree       | Mod agree | Str agree | Disagree  | Disagree  | Mod agree | Mod agree | Disagree  | Disagree | Disagree | Disagree | Disagree | Disagree | Disagree  | Reduced      | Satisfactory |              |
| > 50  | Female | PhD        | Geology             | Geo Energy Resources          | 4 - 9 | Rarely  | Never  | Well prepared  | Mod prepared   | Equ important      | Medium | Moderately agree     | Strongly agree       | Strongly agree       | N agree nor disagree | N agree nor disagree | Str agree | Str agree | Disagree  | Disagree  | Mod agree | Mod agree | Disagree  | Disagree | Disagree | Disagree | Disagree | Disagree | Disagree  | Reduced      | Satisfactory |              |
| 41-50 | Male   | Master's   | Geology             | Geo Energy Resources          | 1 - 3 | Never   | Never  | Well prepared  | Mod prepared   | Equ important      | Medium | Moderately agree     | Moderately agree     | Moderately agree     | Strongly disagree    | Strongly agree       | Mod agree | Str agree | Disagree  | Disagree  | Mod agree | Mod agree | Disagree  | Disagree | Disagree | Disagree | Disagree | Disagree | Disagree  | Reduced      | Satisfactory |              |
| 41-50 | Female | Master's   | Geology             | Geo Energy Resources          | 1 - 3 | Rarely  | Rarely | Well prepared  | Mod prepared   | Very important     | High   | Strongly agree       | Moderately agree     | Moderately agree     | Strongly disagree    | Strongly agree       | Mod agree | Str agree | Disagree  | Disagree  | Mod agree | Mod agree | Disagree  | Disagree | Disagree | Disagree | Disagree | Disagree | Disagree  | Good         | Satisfactory |              |
| 41-50 | Female | Master's   | Bio & Geol; Environ | Hist & Educ                   | None  | Never   | Never  | Well prepared  | Mod prepared   | Equ important      | Medium | N agree nor disagree | Strongly agree       | Strongly agree       | Moderately agree     | Moderately agree     | Mod agree | Str agree | Disagree  | Disagree  | Mod agree | Mod agree | Disagree  | Disagree | Disagree | Disagree | Disagree | Disagree | Disagree  | Reduced      | Satisfactory |              |
| 41-50 | Female | Master's   | Geol Min Eng        | Environ & Eng Geology         | None  | Often   | Rarely | Mod prepared   | Mod prepared   | Very important     | Low    | Strongly agree       | Moderately agree     | N agree nor disagree | Strongly agree       | Strongly disagree    | Disagree  | Disagree  | Str agree | Disagree  | Mod agree | Str agree | Str agree | Disagree | Disagree | Disagree | Disagree | Disagree | Disagree  | Reduced      | Satisfactory |              |
| 30-40 | Male   | Bachelor's | Bio & Geol; Environ | Hist & Educ                   | > 10  | Never   | Never  | Very well prep | Very well prep | Very important     | High   | Moderately agree     | Moderately agree     | N agree nor disagree | Strongly disagree    | Strongly agree       | Str agree | Str agree | Mod agree | Mod agree | Disagree  | Disagree  | Disagree  | Disagree | Disagree | Disagree | Disagree | Disagree | Disagree  | Reduced      | Satisfactory |              |
| < 30  | Female | Master's   | Bio & Geol; Environ | Hist & Educ                   | 4 - 9 | Never   | Rarely | Well prepared  | Well prepared  | Equ important      | Medium | Moderately agree     | Moderately agree     | Strongly agree       | N agree nor disagree | N agree nor disagree | Disagree  | Str agree | Str agree | Disagree  | Disagree  | Disagree  | Disagree  | Disagree | Disagree | Disagree | Disagree | Disagree | Disagree  | Good         | Very satisf  |              |
| < 30  | Female | Master's   | Geol Min Eng        | Geo Energy Resources          | > 10  | Rarely  | Rarely | Well prepared  | Very well prep | Equ important      | High   | Strongly agree       | Moderately agree     | Strongly agree       | Strongly disagree    | Strongly agree       | Str agree | Str agree | Mod agree | Mod agree | Disagree  | Disagree  | Disagree  | Disagree | Disagree | Disagree | Disagree | Disagree | Disagree  | Good         | Satisfactory |              |
| > 50  | Male   | PhD        | Geology             | Environ & Eng Geology         | > 10  | Rarely  | Rarely | Well prepared  | Mod prepared   | Equ important      | High   | Strongly agree       | Moderately agree     | Strongly agree       | Moderately agree     | Moderately agree     | Str agree | Str agree | Disagree  | Disagree  | Mod agree | Mod agree | Disagree  | Disagree | Disagree | Disagree | Disagree | Disagree | Disagree  | Good         | Satisfactory |              |
| > 50  | Male   | PhD        | Geology             | Environ & Eng Geology         | 4 - 9 | Rarely  | Never  | Well prepared  | Mod prepared   | Very important     | Medium | Moderately agree     | Moderately disagree  | N agree nor disagree | N agree nor disagree | N agree nor disagree | Str agree | Disagree  | Disagree  | Disagree  | Disagree  | Mod agree | Mod agree | Disagree | Disagree | Disagree | Disagree | Disagree | Disagree  | Disagree     | Fair         | Satisfactory |
| < 30  | Female | Master's   | Bio & Geol; Environ | Environ & Eng Geology         | None  | Never   | Never  | Mod prepared   | Mod prepared   | Equ important      | Medium | Strongly agree       | Moderately agree     | Moderately agree     | Strongly disagree    | Strongly agree       | Str agree | Str agree | Disagree  | Disagree  | Mod agree | Mod agree | Disagree  | Disagree | Disagree | Disagree | Disagree | Disagree | Disagree  | Reduced      | Few satis    |              |
| > 50  | Male   | PhD        | Geol Min Eng        | Int Geod, Geoph, Petrol Geoch | > 10  | Rarely  | Rarely | Mod prepared   | Well prepared  | Very important     | Low    | Strongly agree       | Strongly agree       | Strongly agree       | Moderately disagree  | Strongly agree       | Mod agree | Str agree | Disagree  | Disagree  | Mod agree | Mod agree | Disagree  | Disagree | Disagree | Disagree | Disagree | Disagree | Disagree  | Disagree     | Very good    | Very satisf  |
| > 50  | Male   | PhD        | Geology             | Ext Geod & Palaeont           | 4 - 9 | Usually | Rarely | Well prepared  | Well prepared  | Equ important      | High   | Strongly agree       | Strongly agree       | Strongly agree       | Strongly disagree    | Strongly agree       | Str agree | Str agree | Disagree  | Disagree  | Disagree  | Disagree  | Disagree  | Disagree | Disagree | Disagree | Disagree | Disagree | Disagree  | Disagree     | Very good    | Very satisf  |
| > 50  | Male   | PhD        | Geology             | Ext Geod & Palaeont           | 4 - 9 | Usually | Rarely | Well prepared  | Mod prepared   | Equ important      | Medium | Strongly agree       | Strongly agree       | Strongly agree       | Strongly disagree    | Strongly agree       | Str agree | Str agree | Disagree  | Disagree  | Disagree  | Disagree  | Disagree  | Disagree | Disagree | Disagree | Disagree | Disagree | Disagree  | Fair         | Satisfactory |              |
| > 50  | Female | Master's   | Geology             | Geo Energy Resources          | > 10  | Usually | Rarely | Very well prep | Mod prepared   | Very important     | Medium | Strongly agree       | Strongly agree       | Moderately agree     | Strongly disagree    | Strongly agree       | Mod agree | Str agree | Disagree  | Disagree  | Mod agree | Mod agree | Disagree  | Disagree | Disagree | Disagree | Disagree | Disagree | Disagree  | Reduced      | Satisfactory |              |
| > 50  | Male   | PhD        | Geology             | Geo Energy Resources          | 4 - 9 | Rarely  | Never  | Well prepared  | Mod prepared   | Equ important      | Medium | Moderately agree     | Strongly agree       | Strongly agree       | Strongly disagree    | Strongly agree       | Mod agree | Str agree | Disagree  | Disagree  | Mod agree | Mod agree | Disagree  | Disagree | Disagree | Disagree | Disagree | Disagree | Disagree  | Reduced      | Satisfactory |              |
| > 50  | Female | Master's   | Geology             | Geocns & Geot                 | 1 - 3 | Never   | Never  | Well prepared  | Well prepared  | Quite important    | Medium | Strongly agree       | Strongly agree       | Strongly agree       | Moderately agree     | Moderately agree     | Str agree | Str agree | Disagree  | Disagree  | Mod agree | Mod agree | Disagree  | Disagree | Disagree | Disagree | Disagree | Disagree | Disagree  | Fair         | Very satisf  |              |
| > 50  | Male   | Master's   | Geology             | Ext Geod & Palaeont           | > 10  | Never   | Never  | Well prepared  | Well prepared  | Equ important      | Medium | Moderately agree     | Moderately agree     | Moderately agree     | Strongly disagree    | Strongly agree       | Mod agree | Disagree  | Disagree  | Disagree  | Mod agree | Mod agree | Disagree  | Disagree | Disagree | Disagree | Disagree | Disagree | Disagree  | Fair         | Very satisf  |              |
| > 50  | Male   | Master's   | Geology             | Geocns & Geot                 | > 10  | Never   | Never  | Well prepared  | Mod prepared   | Equ important      | High   | Strongly agree       | Strongly agree       | Strongly agree       | Strongly disagree    | Strongly agree       | Disagree  | Str agree | Disagree  | Disagree  | Disagree  | Disagree  | Disagree  | Disagree | Disagree | Disagree | Disagree | Disagree | Disagree  | Very good    | Very satisf  |              |
| 30-40 | Female | Bachelor's | Bio & Geol; Environ | Hist & Educ                   | None  | Never   | Never  | Not prepared   | Not prepared   | Not very important | Low    | Strongly disagree    | Strongly agree       | Moderately disagree  | Strongly disagree    | Moderately disagree  | Disagree | Disagree | Disagree | Disagree | Disagree | Disagree  | Reduced      | Few satis    |              |
| 30-40 | Female | PhD        | Geology             | Int Geod, Geoph, Petrol Geoch | 1 - 3 | Never   | Rarely | Mod prepared   | Mod prepared   | Equ important      | Medium | Moderately agree     | Moderately agree     | N agree nor disagree | N agree nor disagree | Moderately agree     | Mod agree | Str agree | Disagree  | Disagree  | Mod agree | Mod agree | Disagree  | Disagree | Disagree | Disagree | Disagree | Disagree | Disagree  | Mod agree    | Few satis    |              |
| > 50  | Male   | PhD        | Geology             | Int Geod, Geoph, Petrol Geoch | 1 - 3 | Never   | Rarely | Mod prepared   | Mod prepared   | Equ important      | Medium | Moderately agree     | Moderately agree     | N agree nor disagree | N agree nor disagree | N agree nor disagree | Mod agree | Mod agree | Disagree  | Disagree  | Mod agree | Mod agree | Disagree  | Disagree | Disagree | Disagree | Disagree | Disagree | Disagree  | Disagree     | Reduced      | Few satis    |
| < 30  | Male   | Bachelor's | Bio & Geol; Environ | Geo Energy Resources          | > 10  | Rarely  | Never  | Well prepared  | Mod prepared   | Quite important    | Low    | N agree nor disagree | Strongly agree       | Moderately agree     | Strongly disagree    | Moderately agree     | Mod agree | Str agree | Disagree  | Disagree  | Mod agree | Mod agree | Disagree  | Disagree | Disagree | Disagree | Disagree | Disagree | Disagree  | Disagree     | Reduced      | Satisfactory |
| 30-40 | Female | Master's   | Geology             | Geo Energy Resources          | 1 - 3 | Never   | Never  | Well prepared  | Mod prepared   | Equ important      | High   | Strongly agree       | Strongly agree       | Moderately agree     | Moderately agree     | Moderately agree     | Mod agree | Str agree | Disagree  | Disagree  | Mod agree | Mod agree | Disagree  | Disagree | Disagree | Disagree | Disagree | Disagree | Disagree  | Disagree     | Good         | Satisfactory |
| > 50  | Female | Master's   | Geology             | Geo Energy Resources          | > 10  | Often   | Often  | Well prepared  | Well prepared  | Very important     | Medium | Moderately agree     | Strongly agree       | Strongly agree       | N agree nor disagree | N agree nor disagree | Mod agree | Mod agree | Disagree  | Disagree  | Mod agree | Mod agree | Disagree  | Disagree | Disagree | Disagree | Disagree | Disagree | Disagree  | Disagree     | Very good    | Very satisf  |
| < 30  | Female | Master's   | Geology             | Environ & Eng Geology         | > 10  | Often   | Often  | Well prepared  | Well prepared  | Equ important      | Medium | Moderately agree     | Moderately agree     | N agree nor disagree | N agree nor disagree | N agree nor disagree | Mod agree | Str agree | Disagree  | Disagree  | Mod agree | Mod agree | Disagree  | Disagree | Disagree | Disagree | Disagree | Disagree | Disagree  | Disagree     | Reduced      | Satisfactory |
| 41-50 | Male   | Bachelor's | Geology             | Int Geod, Geoph, Petrol Geoch | 4 - 9 | Never   | Never  | Not prepared   | Not prepared   | Very important     | High   | Strongly agree       | Moderately agree     | N agree nor disagree | Moderately disagree  | Moderately agree     | Disagree  | Disagree  | Disagree  | Disagree  | Mod agree | Mod agree | Disagree  | Disagree | Disagree | Disagree | Disagree | Disagree | Disagree  | Disagree     | Reduced      | Unsatisf     |
| > 50  | Male   | PhD        | Geology             | Geo Energy Resources          | > 10  | Often   | Often  | Very well prep | Very well prep | Very important     | Low    | Strong               |                      |                      |                      |                      |           |           |           |           |           |           |           |          |          |          |          |          |           |              |              |              |



[illegible]
